# Supplementary material
Source: publisher figshare collection journal article supplement (https://tandf.figshare.com/ndownloader/files/12296894)
Supplement: Supplementary file 1 [file 12296894]

Supplementary material for  
 “Smooth estimation of a reliability function in ranked set sampling”  
 by M. Mahdizadeh and Ehsan Zamanzade

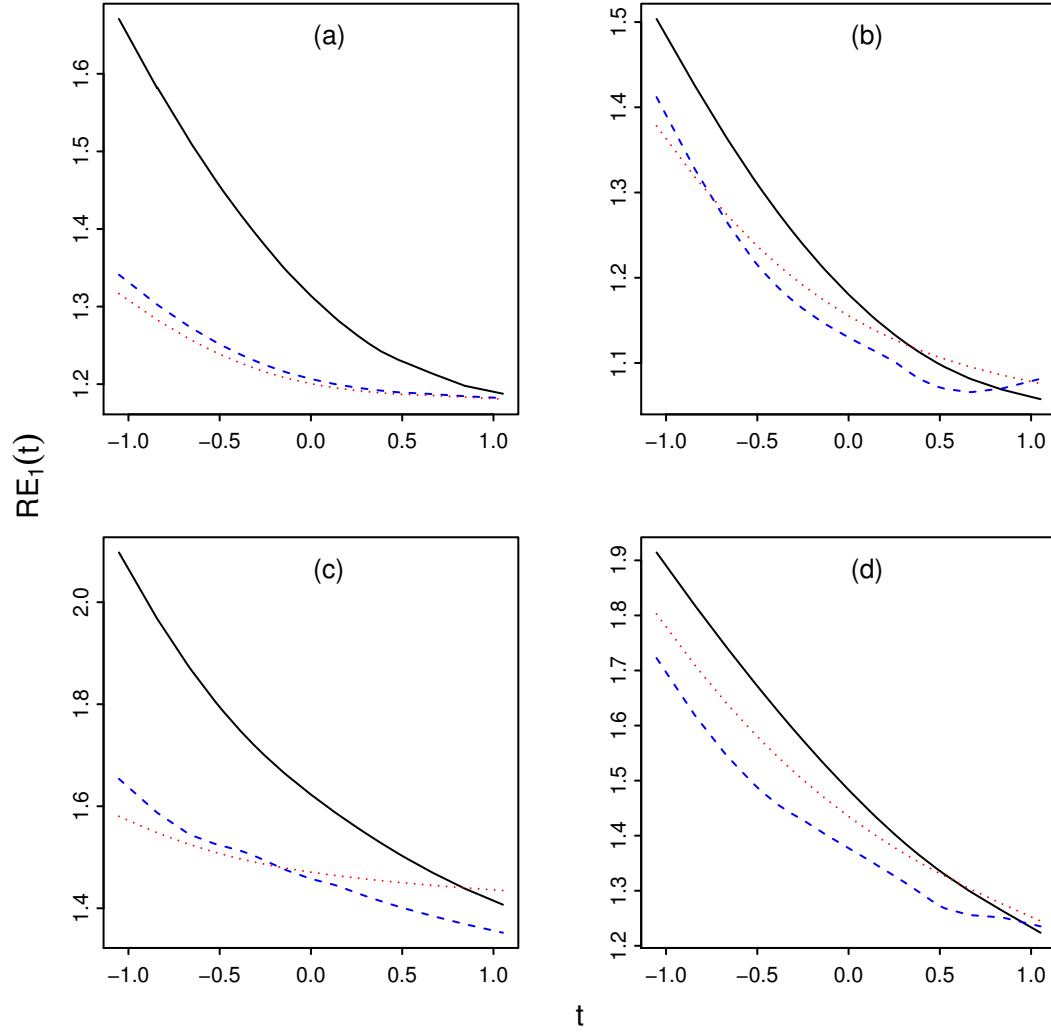

Figure 1: Values of  $RE_1(t)$  for model 2 using NR, UCV and BCV methods denoted by black/solid, blue/dashed and red/dotted curves, respectively.

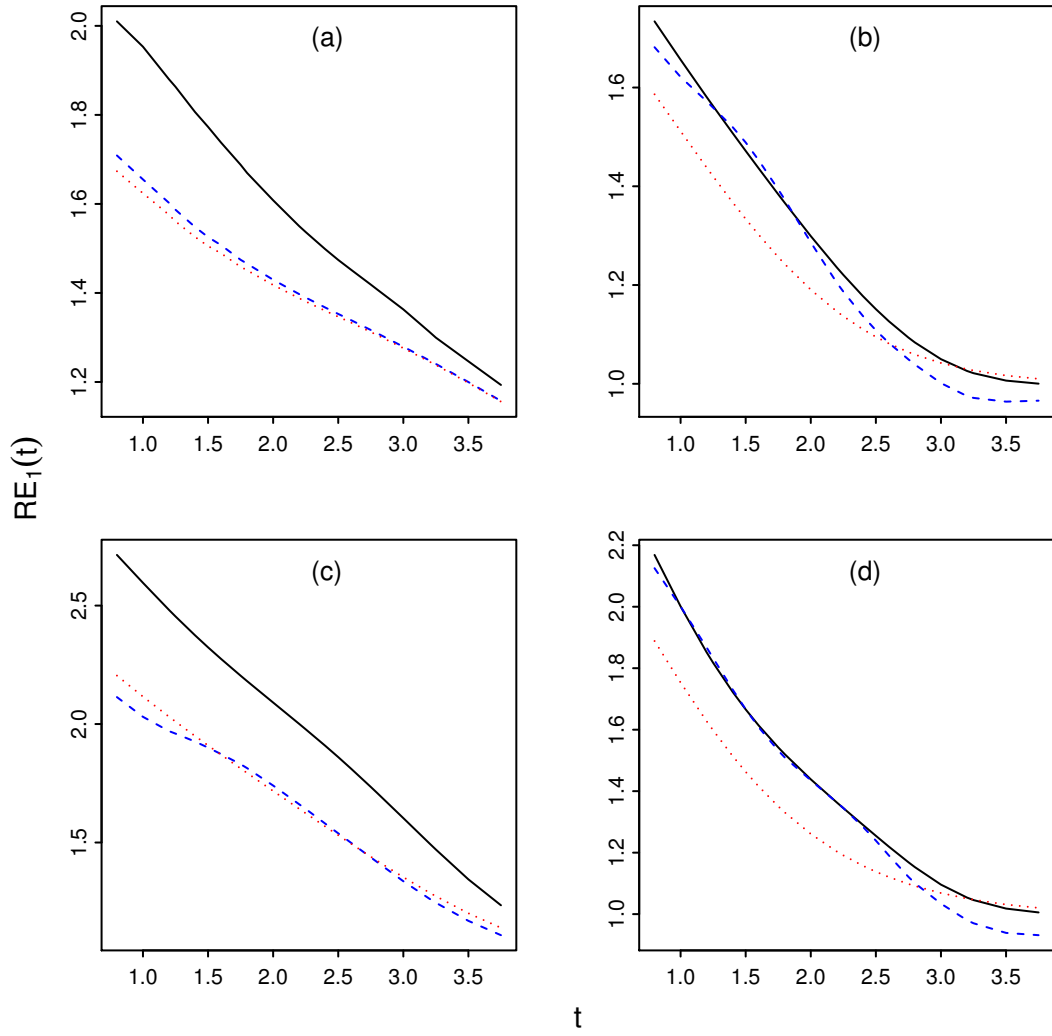

Figure 2: Values of  $RE_1(t)$  for model 3 using NR, UCV and BCV methods denoted by black/solid, blue/dashed and red/dotted curves, respectively.

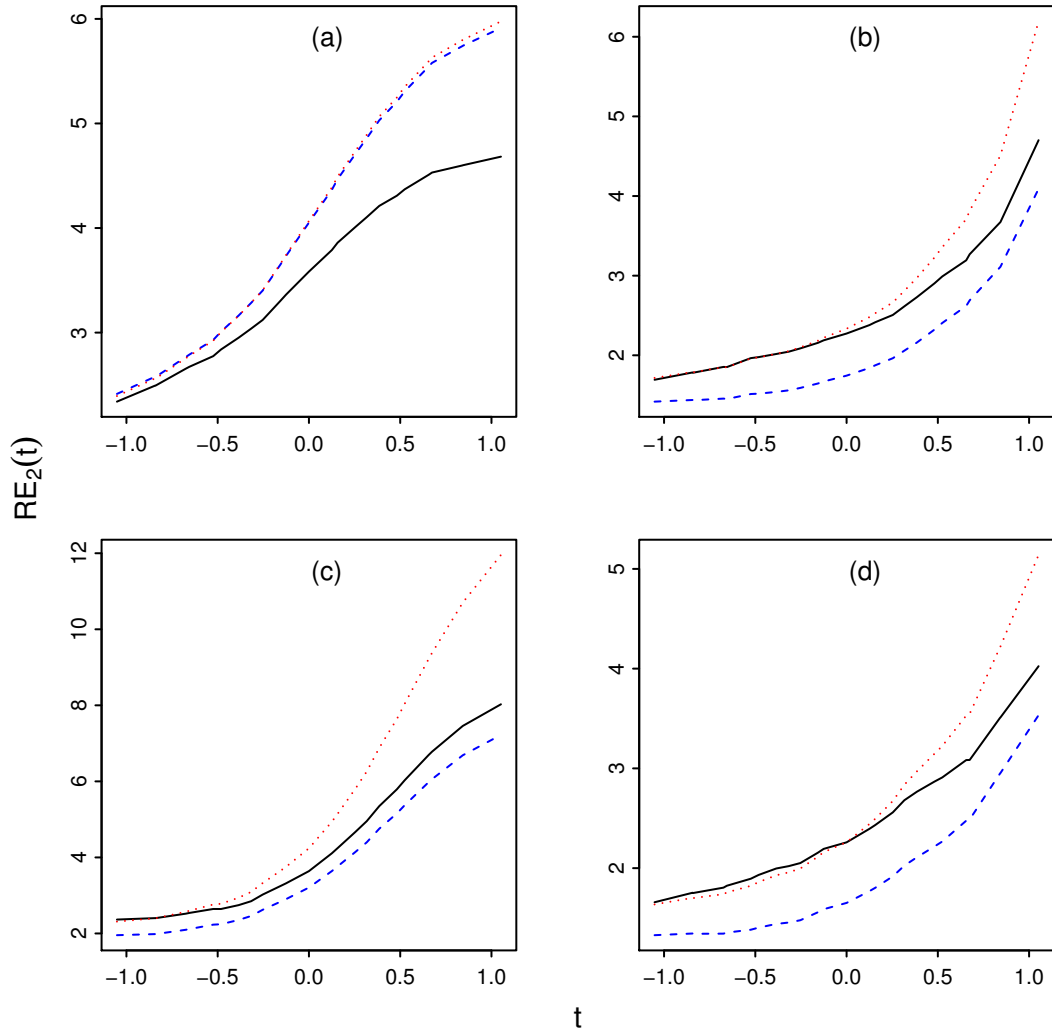

Figure 3: Values of  $RE_2(t)$  for model 2 using NR, UCV and BCV methods denoted by black/solid, blue/dashed and red/dotted curves, respectively.

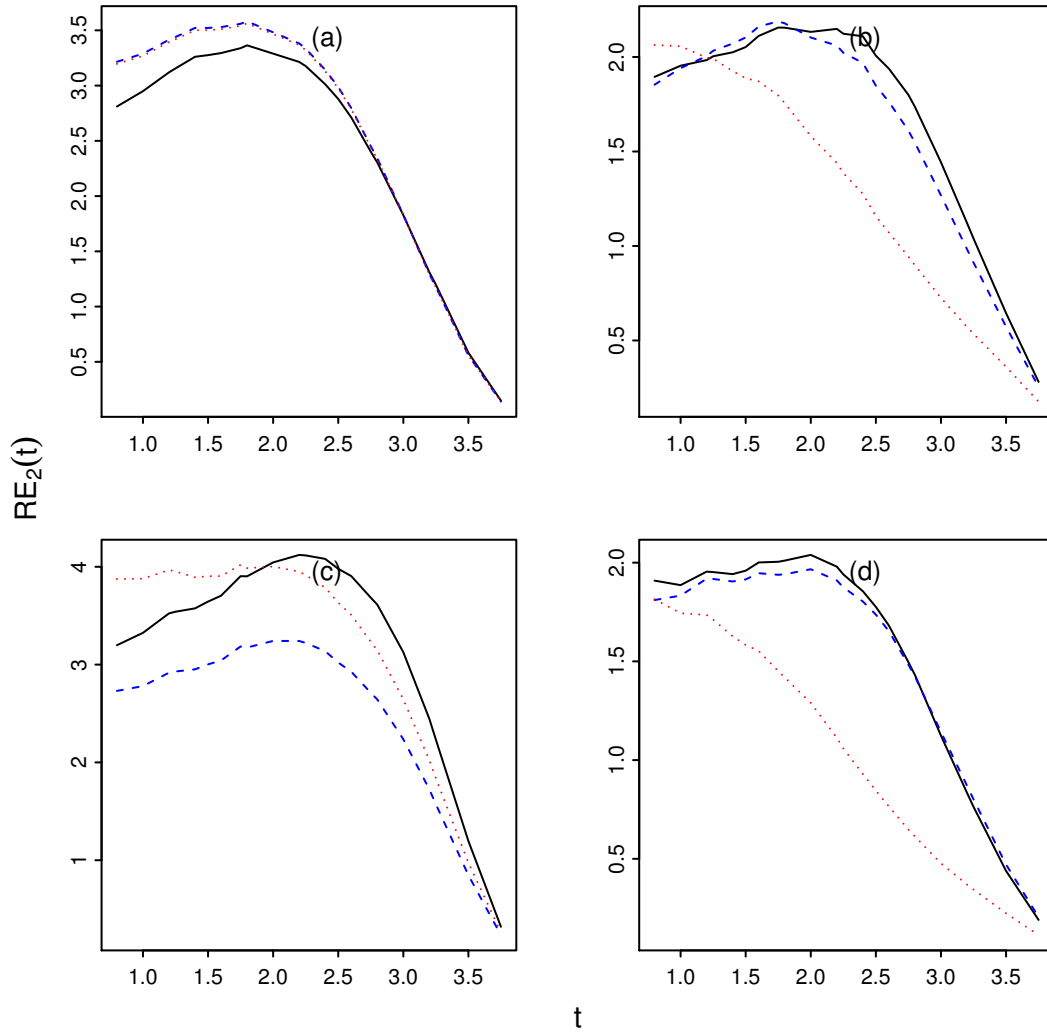

Figure 4: Values of  $RE_2(t)$  for model 3 using NR, UCV and BCV methods denoted by black/solid, blue/dashed and red/dotted curves, respectively.
